# Supplementary material for: The Role of Native T1 and T2 Mapping Times in Identifying PD-L1 Expression and the Histological Subtype of NSCLCs
Source: MDPI journal article supplement (doi:10.3390/cancers15123252), 2023-06-20
Supplement: s1 [file s1]

SUPPLEMENTARY MATERIAL

| Patient ID | T1 core | T1 mean | T1 micro-env. 3 mm | T1 micro-env. 6 mm | T1 periphery | T1 lung | T2 core | T2 mean | T2 micro-env 3mm | T2 micro-env 6mm | T2 periphery | T2 lung | Histotype | PD-L1 expression |
|------------|---------|---------|--------------------|--------------------|--------------|---------|---------|---------|------------------|------------------|--------------|---------|-----------|------------------|
| Patient 1  |         |         |                    |                    |              |         | 133     | 86,57   | 77               | 80               | 68           | 207     | SCC       | 90%              |
| Patient 2  | 1184    | 1136    | 839                | 785                | 1086         | 732     | 80      | 87,5    | 203              | 216              | 88           | 250     | S.D.      | 90%              |
| Patient 3  | 1024    | 1128,5  | 1341               | 852                | 1059         | 921     | 83      | 93,8    | 207              | 231              | 103          | 256     | S.D.      | <1%              |
| Patient 4  | 1175    | 1116,75 |                    |                    | 1148         | 962     | 77      | 87      |                  |                  | 79           | 163     | S.D.      | 35%              |
| Patient 5  | 1033    | 887,6   | 853                | 814                | 1056         | 872     | 91      | 91      | 198              | 203              | 95           | 255     | S.D.      | <1%              |
| Patient 6  | 1012    | 1097,5  | 920                | 919                | 1111         | 900     | 84      | 88      | 194              | 213              | 94           | 212     | SCC       | 80%              |
| Patient 7  | 1223    | 1321,6  | 977                | 999                | 1223         | 811     | 132     | 156,5   | 225              | 233              | 137          | 229     | S.D.      | 90%              |
| Patient 8  | 1152    | 1096,5  | 925                | 952                | 1172         | 895     | 108     | 87      | 109              | 116              | 89           | 198     | ADK       | 5%               |
| Patient 9  | 1031    | 1165    | 992                | 954                | 1124         | 805     | 148     | 176     | 234              | 239              | 143          | 257     | S.D.      | <1%              |
| Patient 10 | 1152    | 1229,2  | 937                | 814                | 1152         | 732     | 93      | 92,9    | 157              | 150              | 82           | 241     | SCC       | 60%              |
| Patient 11 |         | 928     |                    |                    |              |         | 78      | 79,3    | 127              | 136              | 88           | 221     | SCC       | <1%              |
| Patient 12 | 1051    | 1272    | 877                | 830                | 1154         | 710     | 125     | 144,6   | 216              | 219              | 152          | 257     | ADK       | 90%              |
| Patient 13 | 1132    | 1139    | 1020               | 1031               | 1169         | 927     | 85      | 93      | 147              | 158              | 90           | 231     | ADK       | 5%               |
| Patient 14 | 903     | 886     | 893                | 879                | 835          | 869     | 79      | 75,7    | 213              | 214              | 103          | 198     | SCC       | 80%              |
| Patient 15 | 1159    | 1145    | 1128               | 947                | 1229         | 819     |         |         |                  |                  |              |         | ADK       | <1%              |
| Patient 16 | 1132    | 1197,5  | 844                | 850                | 1175         | 828     | 89      | 90      | 210              | 235              | 105          | 257     | ADK       | 5%               |
| Patient 17 | 1036    | 993,5   | 995                | 1021               | 1029         | 912     | 100     | 108     | 159              | 177              | 103          | 254     | ADK       | <1%              |

|            |      |         |      |      |      |     |     |        |     |     |     |     |      |       |
|------------|------|---------|------|------|------|-----|-----|--------|-----|-----|-----|-----|------|-------|
| Patient 18 | 1179 | 1157    | 941  | 951  | 1141 | 919 | 82  | 95     | 139 | 151 | 93  | 206 | ADK  | <1%   |
| Patient 19 | 1184 | 1174    | 984  | 982  | 1137 | 872 | 83  | 87     | 89  | 91  | 80  | 224 | SCC  | 30%   |
| Patient 20 | 1079 | 1142    | 949  | 919  | 1133 | 933 | 130 | 145    | 229 | 231 | 150 | 257 | SCC  | <1%   |
| Patient 21 | 1295 | 1206    | 1061 | 967  | 1164 | 912 | 186 | 150    | 224 | 236 | 176 | 255 | ADK  | >1%   |
| Patient 22 | 1137 | 1167    | 1018 | 985  | 1117 | 912 | 103 | 112,25 | 203 | 218 | 116 | 249 | ADK  | <1%   |
| Patient 23 |      |         |      |      |      |     | 92  | 105,4  | 203 | 207 | 109 | 238 | ADK  | <1%   |
| Patient 24 | 1193 | 1214    | 1079 | 1069 | 1347 | 919 | 91  | 84,4   | 84  | 83  | 86  | 180 | ADK  | <1%   |
| Patient 25 | 1178 | 1171,5  | 1007 | 991  | 1199 | 814 | 115 | 121,75 | 180 | 194 | 130 | 257 | ADK  | 1-49% |
| Patient 26 |      | 909,5   |      |      |      |     | 99  | 105,4  | 187 | 181 | 96  | 234 | S.D. | >50%  |
| Patient 27 | 1197 | 1271,5  | 845  | 877  | 1270 | 967 | 65  | 105,8  | 201 | 210 | 68  | 238 | ADK  | <1%   |
| Patient 28 | 689  | 745     | 828  | 826  | 760  | 907 | 65  | 80     | 178 | 183 | 81  | 249 | SCC  | 10%   |
| Patient 29 | 1034 | 1033    | 976  | 956  | 1017 | 971 | 102 | 112    | 205 | 205 | 99  | 251 | SCC  | 1-49% |
| Patient 30 |      |         |      |      |      |     | 156 | 155    | 246 | 249 | 159 | 257 | SCC  | 10%   |
| Patient 31 |      | 1123,5  |      |      |      |     |     | 93,2   |     |     |     |     | S.D. |       |
| Patient 32 | 989  | 1061,5  | 939  | 951  | 1087 | 896 | 104 | 110,2  | 219 | 220 | 134 | 256 | SCC  |       |
| Patient 33 | 1141 | 1175,75 | 1121 | 1128 | 1208 | 957 | 108 | 110,6  | 137 | 142 | 97  | 255 | S.D. |       |

Table s1. Table of 33 patients enrolled in the histotype study, including the 30 available PD-L1 values. The PD-L1 expression is reported in its original form, in our study it has been discretized with a 1% threshold. Unit of measure of T1 and T2 mapping time is ms.
